# Supplementary material for: Comparative transcriptomic analysis of THP‐1‐derived macrophages infected with Mycobacterium tuberculosis H37Rv, H37Ra and BCG
Source: PubMed Central journal article supplement (PMC8581329; doi:10.1111/jcmm.16980), 2021-10-10
Supplement: JCMM-25-10504-s001.pdf [file JCMM-25-10504-s001.pdf]

**Supplementary Table 1 NC vs H37Rv differentially expressed genes**

| <b>Gene ID</b> | <b>Gene Symbol</b> | <b>Control Expression</b> | <b>Control Expression</b> | <b>Control Expression</b> | <b>H37Rv Expression</b> | <b>H37Rv Expression</b> | <b>H37Rv Expression</b> | <b>log<sub>2</sub> FC H37Rv/NC</b> |
|----------------|--------------------|---------------------------|---------------------------|---------------------------|-------------------------|-------------------------|-------------------------|------------------------------------|
| 4495           | MT1G               | 1.14                      | 2.07                      | 1.91                      | 213.46                  | 221.4                   | 237.65                  | 7.05441                            |
| 4493           | MT1E               | 7.93                      | 9.05                      | 6.56                      | 183.41                  | 200.85                  | 248.17                  | 4.72894                            |
| 4501           | MT1X               | 17.38                     | 20.53                     | 22.14                     | 370.87                  | 386.49                  | 600.71                  | 4.48037                            |
| 4502           | MT2A               | 50.62                     | 51.69                     | 51                        | 897.59                  | 1033.29                 | 1315.95                 | 4.39469                            |
| 482            | ATP1B2             | 0.37                      | 0.38                      | 0.35                      | 7.55                    | 7.08                    | 7.58                    | 4.30972                            |
| 5055           | SERPINB2           | 1.12                      | 2.01                      | 1.8                       | 24.28                   | 24.49                   | 11.37                   | 3.68259                            |
| 4494           | MT1F               | 3.03                      | 4.43                      | 4.89                      | 32.32                   | 36.74                   | 27.12                   | 3.10824                            |
| 4884           | NPTX1              | 1.05                      | 0.94                      | 0.74                      | 5.59                    | 5.64                    | 13.27                   | 3.0404                             |
| 9437           | NCR1               | 0.14                      | 0.25                      | 0.31                      | 1.57                    | 1.79                    | 2.25                    | 3.02636                            |
| 9945           | GFPT2              | 0.39                      | 0.29                      | 0.46                      | 2.88                    | 3.06                    | 1.53                    | 2.7719                             |
| 4256           | MGP                | 9.42                      | 9.14                      | 9.19                      | 0.6                     | 0.67                    | 0.99                    | -3.50779                           |
| 358            | AQP1               | 3.88                      | 3.98                      | 3.86                      | 0.34                    | 0.55                    | 0.33                    | -3.24084                           |
| 4332           | MNDA               | 1.8                       | 1.39                      | 1.49                      | 0.33                    | 0.13                    | 0.14                    | -2.94977                           |
| 10563          | CXCL13             | 1.74                      | 1.7                       | 1.14                      | 0.25                    | 0.15                    | 0.21                    | -2.92217                           |
| 8685           | MARCO              | 3.41                      | 3.23                      | 3.65                      | 0.65                    | 0.44                    | 0.35                    | -2.88523                           |
| 255061         | TAC4               | 6.04                      | 4.71                      | 5.92                      | 0.87                    | 0.75                    | 0.75                    | -2.8118                            |
| 3381           | IBSP               | 1.8                       | 1.95                      | 1.74                      | 0.29                    | 0.11                    | 0.45                    | -2.76324                           |
| 11326          | VSIG4              | 3.11                      | 2.94                      | 3.18                      | 0.64                    | 0.48                    | 0.3                     | -2.69872                           |
| 91543          | RSAD2              | 1.38                      | 1.53                      | 1.07                      | 0.23                    | 0.19                    | 0.11                    | -2.61633                           |
| 7850           | IL1R2              | 32.85                     | 36.26                     | 34.26                     | 7.51                    | 5.25                    | 3.55                    | -2.58408                           |

**Supplementary Table 2 NC vs H37Ra differentially expressed genes**

| Gene ID | Gene Symbol | Control Expression | Control Expression | Control Expression | H37Ra Expression | H37Ra Expression | H37Ra Expression | log <sub>2</sub> FC H37Ra/NC |
|---------|-------------|--------------------|--------------------|--------------------|------------------|------------------|------------------|------------------------------|
| 4495    | MT1G        | 1.14               | 2.07               | 1.91               | 220.76           | 217.65           | 156.79           | 6.88497                      |
| 4493    | MT1E        | 7.93               | 9.05               | 6.56               | 200.94           | 210.31           | 148.91           | 4.58357                      |
| 482     | ATP1B2      | 0.37               | 0.38               | 0.35               | 8.94             | 6.86             | 10.97            | 4.57244                      |
| 4501    | MT1X        | 17.38              | 20.53              | 22.14              | 510.73           | 516.52           | 335.1            | 4.53317                      |
| 4502    | MT2A        | 50.62              | 51.69              | 51                 | 1022.85          | 1079.38          | 748.54           | 4.23757                      |
| 4884    | NPTX1       | 1.05               | 0.94               | 0.74               | 9.87             | 10.87            | 5.96             | 3.25702                      |
| 9437    | NCR1        | 0.14               | 0.25               | 0.31               | 1.74             | 1.67             | 2.12             | 2.96096                      |
| 5055    | SERPINB2    | 1.12               | 2.01               | 1.8                | 7.67             | 10.99            | 15.1             | 2.75156                      |
| 4494    | MT1F        | 3.03               | 4.43               | 4.89               | 27.73            | 20.23            | 21.11            | 2.65306                      |
| 335     | APOA1       | 1.51               | 1.57               | 1.52               | 7.11             | 9.81             | 7.14             | 2.48951                      |
| 358     | AQP1        | 3.88               | 3.98               | 3.86               | 0.24             | 0.38             | 0.26             | -3.69808                     |
| 4256    | MGP         | 9.42               | 9.14               | 9.19               | 0.57             | 0.61             | 1.05             | -3.53989                     |
| 255061  | TAC4        | 6.04               | 4.71               | 5.92               | 0.2              | 0.62             | 0.73             | -3.40367                     |
| 366     | AQP9        | 1.54               | 1.4                | 1.47               | 0.12             | 0.03             | 0.21             | -3.23309                     |
| 10563   | CXCL13      | 1.74               | 1.7                | 1.14               | 0.15             | 0.05             | 0.31             | -3.17041                     |
| 151     | ADRA2B      | 6.4                | 5.7                | 6.27               | 0.54             | 1.05             | 0.91             | -2.88113                     |
| 3381    | IBSP        | 1.8                | 1.95               | 1.74               | 0.41             | 0.11             | 0.23             | -2.87398                     |
| 2006    | ELN         | 2.43               | 2.47               | 2.7                | 0.22             | 0.53             | 0.27             | -2.87392                     |
| 8685    | MARCO       | 3.41               | 3.23               | 3.65               | 0.54             | 0.67             | 0.38             | -2.70319                     |
| 23769   | FLRT1       | 1.1                | 1.09               | 1.12               | 0.19             | 0.15             | 0.14             | -2.66564                     |

**Supplementary Table 3 NC vs BCG differentially expressed genes**

| <b>Gene ID</b> | <b>Gene Symbol</b> | <b>Control Expression</b> | <b>Control Expression</b> | <b>Control Expression</b> | <b>BCG Expression</b> | <b>BCG Expression</b> | <b>BCG Expression</b> | <b>log<sub>2</sub> FC BCG/NC</b> |
|----------------|--------------------|---------------------------|---------------------------|---------------------------|-----------------------|-----------------------|-----------------------|----------------------------------|
| 4495           | MT1G               | 1.14                      | 2.07                      | 1.91                      | 180.34                | 118.79                | 140.04                | 6.45759                          |
| 482            | ATP1B2             | 0.37                      | 0.38                      | 0.35                      | 8.65                  | 9.37                  | 11.38                 | 4.69466                          |
| 4501           | MT1X               | 17.38                     | 20.53                     | 22.14                     | 467.37                | 350.33                | 345                   | 4.31341                          |
| 4493           | MT1E               | 7.93                      | 9.05                      | 6.56                      | 178.38                | 143.05                | 136.71                | 4.29517                          |
| 4502           | MT2A               | 50.62                     | 51.69                     | 51                        | 1125.13               | 875.4                 | 818.68                | 4.23192                          |
| 4884           | NPTX1              | 1.05                      | 0.94                      | 0.74                      | 17.96                 | 14.69                 | 13.39                 | 4.04416                          |
| 169966         | TENT5D             | 0.12                      | 0                         | 0                         | 1.24                  | 1.38                  | 0.74                  | 3.96517                          |
| 9437           | NCR1               | 0.14                      | 0.25                      | 0.31                      | 2.58                  | 1.38                  | 3.47                  | 3.47553                          |
| 5055           | SERPINB2           | 1.12                      | 2.01                      | 1.8                       | 12                    | 12.06                 | 11.92                 | 2.88697                          |
| 4494           | MT1F               | 3.03                      | 4.43                      | 4.89                      | 27.9                  | 27.29                 | 18.63                 | 2.72942                          |
| 255061         | TAC4               | 6.04                      | 4.71                      | 5.92                      | 0.22                  | 0.11                  | 0.65                  | -4.04425                         |
| 2006           | ELN                | 2.43                      | 2.47                      | 2.7                       | 0.19                  | 0.18                  | 0.22                  | -3.69062                         |
| 269            | AMHR2              | 1.21                      | 1.71                      | 1.47                      | 0.21                  | 0.14                  | 0.1                   | -3.52794                         |
| 284106         | CISD3              | 1.86                      | 2.28                      | 1.99                      | 0.1                   | 0                     | 0.56                  | -3.25241                         |
| 358            | AQP1               | 3.88                      | 3.98                      | 3.86                      | 0.37                  | 0.63                  | 0.32                  | -3.1471                          |
| 11326          | VSIG4              | 3.11                      | 2.94                      | 3.18                      | 0.23                  | 0.41                  | 0.23                  | -3.11836                         |
| 8685           | MARCO              | 3.41                      | 3.23                      | 3.65                      | 0.25                  | 0.63                  | 0.4                   | -3.03695                         |
| 445329         | SULT1A4            | 2.12                      | 1.28                      | 2.57                      | 0                     | 0.76                  | 0                     | -2.97193                         |
| 6286           | S100P              | 1.36                      | 2.78                      | 3.07                      | 0.05                  | 0.51                  | 0.37                  | -2.96205                         |
| 23397          | NCAPH              | 20.43                     | 20.92                     | 21.46                     | 2.04                  | 3.5                   | 2.94                  | -2.86189                         |

**Supplementary Table 4 Common differentially expressed genes**

| <b>Gene ID</b> | <b>Gene Symbol</b> | <b>Control Expression</b> | <b>H37Rv Expression</b> | <b>H37Ra Expression</b> | <b>BCG Expression</b> |
|----------------|--------------------|---------------------------|-------------------------|-------------------------|-----------------------|
| 219833         | C11orf45           | 2.827                     | 1.203                   | 1.023                   | 0.613                 |
| 9447           | AIM2               | 3.01                      | 1.1                     | 0.777                   | 0.513                 |
| 929            | CD14               | 12.33                     | 5.213                   | 3.593                   | 2.333                 |
| 23397          | NCAPH              | 20.937                    | 5.977                   | 5.283                   | 2.827                 |
| 1536           | CYBB               | 2.763                     | 1.1                     | 1.05                    | 0.687                 |
| 6641           | SNTB1              | 23.023                    | 10.357                  | 10.993                  | 6.677                 |
| 2335           | FN1                | 406.41                    | 135.703                 | 144.08                  | 71.197                |
| 6752           | SSTR2              | 5.553                     | 2.173                   | 2.37                    | 1.413                 |
| 64881          | PCDH20             | 1.98                      | 0.863                   | 0.58                    | 0.553                 |
| 9214           | FCMR               | 50.26                     | 22.287                  | 18.177                  | 17.07                 |
| 3119           | HLA-DQB1           | 2.673                     | 1.163                   | 1.013                   | 0.877                 |
| 4599           | MX1                | 20.14                     | 5.737                   | 4.62                    | 4.683                 |
| 2006           | ELN                | 2.533                     | 0.433                   | 0.34                    | 0.197                 |
| 255061         | TAC4               | 5.557                     | 0.79                    | 0.517                   | 0.327                 |
| 7079           | TIMP4              | 3.113                     | 1.253                   | 1.12                    | 1.05                  |
| 3959           | LGALS3BP           | 38.197                    | 17.723                  | 16.02                   | 15.05                 |
| 4938           | OAS1               | 31.753                    | 11.35                   | 9.477                   | 8.92                  |
| 11009          | IL24               | 28.04                     | 12.28                   | 6.833                   | 10.01                 |
| 55509          | BATF3              | 3.44                      | 1.437                   | 0.913                   | 1.177                 |
| 57214          | CEMIP              | 4.073                     | 1.44                    | 0.713                   | 1.177                 |
| 26471          | NUPR1              | 11.67                     | 4.71                    | 4.01                    | 4.96                  |
| 3428           | IFI16              | 28.01                     | 11.52                   | 9.17                    | 11.55                 |
| 4939           | OAS2               | 31.89                     | 11.843                  | 9.367                   | 11.733                |
| 7099           | TLR4               | 2.287                     | 0.65                    | 0.473                   | 0.657                 |
| 5473           | PPBP               | 64.557                    | 19.517                  | 10.63                   | 17.86                 |
| 1827           | RCAN1              | 66.447                    | 21.787                  | 14.647                  | 19.457                |
| 285386         | TPRG1              | 3.273                     | 1.177                   | 0.903                   | 1.07                  |
| 259307         | IL4I1              | 58.287                    | 22.803                  | 18.573                  | 21.203                |
| 115207         | KCTD12             | 10.073                    | 4.697                   | 3.57                    | 4.14                  |
| 84868          | HAVCR2             | 24.317                    | 11.267                  | 9.253                   | 10.18                 |
| 151            | ADRA2B             | 6.123                     | 1.673                   | 0.833                   | 1.227                 |
| 1844           | DUSP2              | 194.293                   | 82.603                  | 62.703                  | 70.747                |
| 3575           | IL7R               | 8.083                     | 3.553                   | 2.733                   | 3.923                 |
| 5265           | SERPINA1           | 10.243                    | 3.837                   | 2.833                   | 4.25                  |
| 84171          | LOXL4              | 2.78                      | 0.837                   | 0.593                   | 1.027                 |
| 1230           | CCR1               | 51.53                     | 20.643                  | 16.993                  | 23.123                |
| 1511           | CTSG               | 3.863                     | 1.213                   | 1.257                   | 1.893                 |
| 83758          | RBP5               | 6.517                     | 1.647                   | 1.463                   | 2.51                  |

|           |         |         |        |        |        |
|-----------|---------|---------|--------|--------|--------|
| 122953    | JDP2    | 4.987   | 1.987  | 1.783  | 2.45   |
| 374618    | TEX9    | 9.803   | 2.837  | 2.3    | 3.967  |
| 4481      | MSR1    | 7.937   | 1.727  | 1.573  | 1.647  |
| 3437      | IFIT3   | 26.463  | 8.707  | 8.04   | 8.893  |
| 358       | AQP1    | 3.907   | 0.407  | 0.293  | 0.44   |
| 51700     | CYB5R2  | 4.077   | 1.253  | 1.253  | 1.3    |
| 100129969 | FAM205C | 6.97    | 2.767  | 2.823  | 2.763  |
| 94240     | EPSTI1  | 5.807   | 1.247  | 1.327  | 1.327  |
| 3434      | IFIT1   | 8.71    | 2.087  | 2.163  | 2.15   |
| 29968     | PSAT1   | 108.49  | 29.027 | 29.403 | 29.68  |
| 115362    | GBP5    | 4.437   | 2.037  | 2.163  | 2.107  |
| 10561     | IFI44   | 17.893  | 4.88   | 5.3    | 5.44   |
| 3433      | IFIT2   | 3.62    | 1.103  | 1.377  | 1.177  |
| 2273      | FHL1    | 8.483   | 3.653  | 4.16   | 3.9    |
| 5359      | PLSCR1  | 39.867  | 13.107 | 13.903 | 12.79  |
| 8685      | MARCO   | 3.43    | 0.48   | 0.53   | 0.427  |
| 163732    | CITED4  | 143.023 | 64.967 | 67.32  | 61.757 |
| 115265    | DDIT4L  | 18.183  | 6.33   | 6.82   | 6.06   |
| 54414     | SIAE    | 2.2     | 0.393  | 0.597  | 0.73   |
| 54453     | RIN2    | 8.57    | 3.45   | 4.313  | 4.287  |
| 3429      | IFI27   | 25.987  | 5.64   | 5.287  | 6.52   |
| 26227     | PHGDH   | 30.01   | 7.047  | 6.853  | 8.27   |
| 24138     | IFIT5   | 2.37    | 0.933  | 0.87   | 0.997  |
| 8519      | IFITM1  | 18.21   | 3.167  | 2.597  | 3.827  |
| 256586    | LYSMD2  | 4.36    | 1.29   | 1.4    | 1.597  |
| 11274     | USP18   | 18.193  | 7.34   | 7.843  | 8.89   |
| 440       | ASNS    | 31.99   | 8.22   | 8      | 11.433 |
| 4256      | MGP     | 9.25    | 0.753  | 0.743  | 1.88   |
| 3784      | KCNQ1   | 4.397   | 1.653  | 1.67   | 2.01   |
| 7850      | IL1R2   | 34.457  | 5.437  | 5.71   | 8.86   |
| 8638      | OASL    | 7.253   | 1.997  | 2.013  | 2.57   |
| 8743      | TNFSF10 | 4.3     | 1.19   | 1.213  | 1.5    |
| 3759      | KCNJ2   | 3.73    | 0.783  | 0.753  | 1.08   |
| 80162     | PGHG    | 7.44    | 0.727  | 3.053  | 2.043  |
| 6286      | S100P   | 2.403   | 0.5    | 0.847  | 0.31   |
| 9235      | IL32    | 7.44    | 2.5    | 3.513  | 1.783  |
| 22921     | MSRB2   | 6.687   | 3.107  | 3.737  | 3.127  |
| 4973      | OLR1    | 6.537   | 1.803  | 2.757  | 2.047  |
| 10346     | TRIM22  | 7.993   | 3.12   | 3.71   | 2.707  |
| 11326     | VSIG4   | 3.077   | 0.473  | 0.56   | 0.29   |
| 10578     | GNLY    | 106.64  | 39.02  | 41.07  | 33.76  |
| 58191     | CXCL16  | 29.643  | 13.247 | 13.677 | 10.967 |
| 53840     | TRIM34  | 4.89    | 2.033  | 2.213  | 1.793  |

|        |           |         |          |         |         |
|--------|-----------|---------|----------|---------|---------|
| 10993  | SDS       | 94.507  | 27.283   | 33.067  | 21.193  |
| 122622 | ADSSL1    | 1.323   | 3.54     | 3.057   | 4.92    |
| 5352   | PLOD2     | 2.463   | 7.803    | 6.293   | 11.04   |
| 2821   | GPI       | 45.217  | 105.383  | 99.527  | 138.26  |
| 390940 | PINLYP    | 171.773 | 420.567  | 390.98  | 523.847 |
| 10381  | TUBB3     | 1.28    | 2.897    | 2.627   | 5.067   |
| 79948  | PLPPR3    | 6.33    | 12.793   | 16.423  | 23.397  |
| 91947  | ARRDC4    | 5.923   | 19.71    | 21.087  | 28.813  |
| 6535   | SLC6A8    | 53.207  | 128.253  | 142.367 | 202.92  |
| 402415 | XKRX      | 1.383   | 3.82     | 3.067   | 4.097   |
| 8111   | GPR68     | 5.3     | 15.663   | 12.803  | 17.41   |
| 440695 | ETV3L     | 4.597   | 20.863   | 16.363  | 23.417  |
| 84803  | GPAT3     | 2.163   | 6.74     | 5.563   | 6.8     |
| 3162   | HMOX1     | 133.647 | 422.473  | 313.02  | 399.74  |
| 230    | ALDOC     | 21.74   | 51.713   | 61.633  | 61.31   |
| 6319   | SCD       | 153.997 | 346.883  | 403.997 | 393.913 |
| 6843   | VAMP1     | 3.593   | 6.92     | 8.67    | 8.39    |
| 113177 | IZUMO4    | 2.077   | 5.307    | 6.647   | 6.957   |
| 342667 | STAC2     | 1.67    | 7.087    | 8.177   | 9.443   |
| 10628  | TXNIP     | 82.317  | 302.963  | 361.73  | 451.323 |
| 387763 | C11orf96  | 2.04    | 4.88     | 5.88    | 6.737   |
| 10105  | PPIF      | 81.26   | 168.973  | 163.09  | 189.097 |
| 7053   | TGM3      | 10.93   | 22.537   | 23.71   | 25.277  |
| 30001  | ERO1A     | 17.99   | 41.767   | 45.44   | 45.953  |
| 51129  | ANGPTL4   | 1.5     | 8.927    | 3.853   | 3.8     |
| 5055   | SERPINB2  | 1.643   | 20.047   | 11.253  | 11.993  |
| 126669 | SHE       | 1.217   | 2.743    | 2.283   | 2.21    |
| 10666  | CD226     | 2.453   | 7.587    | 5.907   | 6.43    |
| 4494   | MT1F      | 4.117   | 32.06    | 23.023  | 24.607  |
| 79870  | BAALC     | 1.387   | 4.423    | 3.823   | 2.85    |
| 335    | APOA1     | 1.533   | 7.517    | 8.02    | 5.013   |
| 8349   | HIST2H2BE | 6.607   | 22.04    | 25.393  | 14.14   |
| 29923  | HILPDA    | 4.447   | 16.083   | 21.913  | 15.223  |
| 860    | RUNX2     | 0.973   | 2.457    | 2.967   | 2.313   |
| 25976  | TIPARP    | 18.09   | 48.413   | 54.53   | 50.103  |
| 7434   | VIPR2     | 1.647   | 3.737    | 4.16    | 3.66    |
| 5165   | PDK3      | 2.103   | 4.62     | 6.067   | 5.31    |
| 3638   | INSIG1    | 113.403 | 227.29   | 271.617 | 234.033 |
| 4502   | MT2A      | 51.103  | 1082.277 | 950.257 | 939.737 |
| 9351   | SLC9A3R2  | 1.877   | 4.227    | 4       | 4.34    |
| 6839   | SUV39H1   | 0.98    | 2.783    | 2.66    | 2.853   |
| 11015  | KDEL3     | 6.597   | 12.88    | 13.333  | 13.167  |
| 2204   | FCAR      | 9.203   | 20.003   | 19.65   | 19.923  |

|       |           |        |         |         |         |
|-------|-----------|--------|---------|---------|---------|
| 6518  | SLC2A5    | 4.04   | 15.113  | 15.723  | 13.5    |
| 4501  | MT1X      | 20.017 | 452.69  | 454.117 | 387.567 |
| 3012  | HIST1H2AE | 1.04   | 4.27    | 4.283   | 3.47    |
| 3006  | HIST1H1C  | 29.85  | 66.997  | 70.56   | 60.273  |
| 4495  | MT1G      | 1.707  | 224.193 | 198.4   | 146.39  |
| 4493  | MT1E      | 7.847  | 210.81  | 186.72  | 152.713 |
| 23327 | NEDD4L    | 1.463  | 4.637   | 4.137   | 3.787   |

**Supplementary Table 5 H37Rv differentially expressed genes**

| <b>Gene ID</b> | <b>Gene Symbol</b> | <b>Control Expression</b> | <b>H37Rv Expression</b> | <b>H37Ra Expression</b> | <b>BCG Expression</b> |
|----------------|--------------------|---------------------------|-------------------------|-------------------------|-----------------------|
| 57194          | ATP10A             | 1.55                      | 0.457                   | 0.523                   | 0.767                 |
| 131566         | DCBLD2             | 1.453                     | 3.403                   | 2.11                    | 2.443                 |
| 201799         | TMEM154            | 1.603                     | 0.597                   | 0.717                   | 0.873                 |
| 650            | BMP2               | 7.077                     | 3.487                   | 3.47                    | 3.56                  |
| 121512         | FGD4               | 3.217                     | 1.29                    | 1.547                   | 1.897                 |
| 84824          | FCRLA              | 5.523                     | 15.057                  | 10.797                  | 4.657                 |
| 1809           | DPYSL3             | 2.1                       | 5.553                   | 2.107                   | 2.313                 |
| 2766           | GMPR               | 17.587                    | 8.477                   | 10.753                  | 10.063                |
| 8539           | API5               | 1.577                     | 4.433                   | 6.58                    | 3.333                 |
| 64762          | GAREM1             | 1.09                      | 0.433                   | 0.577                   | 0.437                 |
| 151056         | PLB1               | 1.317                     | 2.74                    | 2.357                   | 1.72                  |
| 79412          | KREMEN2            | 1.113                     | 0.537                   | 0.853                   | 0.857                 |
| 64866          | CDCP1              | 3.427                     | 6.213                   | 3.297                   | 4.93                  |
| 166012         | CHST13             | 1.373                     | 0.54                    | 0.687                   | 0.897                 |
| 2247           | FGF2               | 1.273                     | 2.517                   | 1.767                   | 1.893                 |
| 64092          | SAMSN1             | 2.233                     | 1.177                   | 1.513                   | 1.493                 |
| 2805           | GOT1               | 1.537                     | 0.683                   | 1.327                   | 1.667                 |
| 1917           | EEF1A2             | 27.423                    | 13.5                    | 14.653                  | 17.347                |
| 4023           | LPL                | 664.763                   | 306.883                 | 346.233                 | 337.793               |
| 3209           | HOXA13             | 1.34                      | 0.497                   | 0.62                    | 0.787                 |
| 51363          | CHST15             | 6.073                     | 12.797                  | 11.727                  | 6.38                  |
| 7124           | TNF                | 7.553                     | 16.23                   | 9.31                    | 11.433                |
| 9180           | OSMR               | 1.553                     | 0.387                   | 0.277                   | 0.333                 |
| 51191          | HERC5              | 4.39                      | 2.11                    | 2.717                   | 2.787                 |
| 2920           | CXCL2              | 13.173                    | 39.47                   | 20.953                  | 27.307                |
| 100526842      | RPL17-C18orf32     | 1.62                      | 0.78                    | 0.67                    | 0.97                  |
| 58489          | ABHD17C            | 4.437                     | 2.073                   | 2.343                   | 2.7                   |
| 56241          | SUSD2              | 1.49                      | 0.37                    | 0.627                   | 0.983                 |
| 3207           | HOXA11             | 4.837                     | 2.427                   | 2.833                   | 2.967                 |
| 387522         | TMEM189-UBE2V1     | 2.047                     | 5.597                   | 2.343                   | 3.453                 |
| 2921           | CXCL3              | 24.39                     | 51.957                  | 27.713                  | 38.73                 |
| 83690          | CRISPLD1           | 1.387                     | 0.613                   | 0.957                   | 1.077                 |
| 8614           | STC2               | 1.393                     | 0.74                    | 0.643                   | 1.027                 |
| 8651           | SOCS1              | 1.513                     | 0.657                   | 0.953                   | 0.917                 |
| 338657         | CCDC84             | 3.767                     | 6.227                   | 5.743                   | 6.13                  |
| 100132247      | NPIP5              | 1.08                      | 2.17                    | 1.48                    | 1.633                 |



|           |           |        |        |        |        |
|-----------|-----------|--------|--------|--------|--------|
| 105369230 | 105369230 | 4.397  | 1.913  | 3.013  | 2.043  |
| 6241      | RRM2      | 1.483  | 3.153  | 2.08   | 2.31   |
| 1545      | CYP1B1    | 24.237 | 61.457 | 46.307 | 43.193 |
| 25841     | ABTB2     | 2.263  | 4.583  | 4.127  | 4.18   |
| 6236      | RRAD      | 15.503 | 29.477 | 13.803 | 16.48  |
| 27161     | AGO2      | 2.02   | 4.26   | 2.713  | 3.78   |
| 2919      | CXCL1     | 20.727 | 51.807 | 19.777 | 27.643 |
| 1018      | CDK3      | 1.087  | 0.223  | 0.617  | 0.807  |
| 3274      | HRH2      | 1.737  | 0.627  | 0.707  | 1.133  |
| 10669     | CGREF1    | 1.717  | 0.833  | 1.227  | 1.03   |
| 3777      | KCNK3     | 2.537  | 5.727  | 5.033  | 4.143  |
| 1475      | CSTA      | 2.293  | 0.85   | 1.053  | 1.207  |
| 89848     | FCHSD1    | 14.61  | 31.727 | 30.71  | 26.303 |
| 6855      | SYP       | 11.38  | 21.89  | 18.807 | 15.11  |
| 495       | ATP4A     | 1.457  | 11.087 | 1.493  | 1.457  |
| 22901     | ARSG      | 2.98   | 6.343  | 6.133  | 5.387  |
| 8642      | DCHS1     | 1.743  | 3.69   | 2.79   | 2.67   |
| 3134      | HLA-F     | 1.043  | 0.327  | 0.507  | 0.443  |
| 745       | MYRF      | 15.85  | 30.84  | 29.913 | 28.563 |
| 10630     | PDPN      | 2.797  | 1.293  | 1.517  | 1.62   |
| 57605     | PITPNM2   | 0.933  | 1.83   | 1.563  | 1.65   |
| 102724560 | CBSL      | 3.8    | 1.717  | 1.917  | 2.44   |

**Supplementary Table 6 Primers for real-time polymerase chain reaction (PCR) analysis**

| Genes         | Forward Primer (5'–3')  | Reverse Primer (5'–3') |
|---------------|-------------------------|------------------------|
| IL1 $\beta$   | AAATACCTGTGGCCTTGGGC    | TTGGGATCTACACTCTCCAGCT |
| TNF- $\alpha$ | GAGGCCAAGCCCTGGTATG     | CGGGCCGATTGATCTCAGC    |
| IL10          | GACTTTAAGGGTTACCTGGGTTG | TCACATGCGCCTTGATGTCTG  |
| CCL2          | CTTCTGTGCCTGCTGCTCAT    | CGGAGTTTGGGTTTGCTTGTC  |
| CCL3          | GCTCTCTGCAACCAGTTCTCTG  | TTCTGGACCCACTCCTCACTG  |
| CCL4          | CTGTGCTGATCCCAGTGAATC   | TCAGTTCAGTTCAGGTCATACA |
| CD14          | ACGCCAGAACCTTGTGAGC     | GCATGGATCTCCACCTCTACTG |
| CD36          | GGCTGTGACCGGAACTGTG     | AGGTCTCCAAGTGGCATTAGAA |
| TLR4          | AGACCTGTCCCTGAACCCTAT   | CGATGGACTTCTAAACCAGCCA |
| CXCL8         | AGACAGCAGAGCACACAAGC    | ATGGTTCCTTCCGGTGGT     |
| CSF2          | CATGATGGCCAGCCACTACAA   | ACTGGCTCCCAGCAGTCAAAG  |
| IRF9          | GCCCTACAAGGTGTATCAGTTG  | TGCTGTCGCTTTGATGGTACT  |
